# Supplementary material
Source: PubMed Central journal article supplement (PMC5802366)
Supplement: NIHMS937872-supplement-supplement_1.pdf [file NIHMS937872-supplement-supplement_1.pdf]

**Table 1. Primers used for qPCR and mapping in this study**

| <b>Primer</b> | <b>Sequences (5'-3')</b>   |
|---------------|----------------------------|
| D53RTF:       | GAGGAGGATAGGAAACCTGTGCC    |
| D53RTR:       | GTCTCCTTTCACTGCTGGTAC      |
| D10RTF        | CTGTACAAGTTCGAGTGGCACC     |
| D10RTR        | CCTCGTCCGTCTCCTCGTAC       |
| ActinF        | CTTCATAGGAATGGAAGCTGCGGGTA |
| ActinR        | CGACCACCTTGATCTTCATGCTGCTA |
| Ds3F          | GGGTCTAATCAGATCTATGGTT     |
| Ds3R          | TGTCTAGCTAACTGTGGTTGA      |
| K81114F       | GCTTCATCTTTGGCGACCACCGT    |
| K81114R       | TCCACCGGATTCACGAGATAA      |
| RM3668F       | AGGAGGGAATCGTTCACAAG       |
| RM3668R       | AGGAGGGAATCGTTCACAAG       |

**Table 2. Primers used for generating constructs in this study**

| Construct                 | Primer       | Sequence (5'-3')                                        |
|---------------------------|--------------|---------------------------------------------------------|
| <i>D53:d53</i>            | d53GenF      | CCGGATCCATCTAACGCTCT                                    |
|                           | d53GenR      | AAAAGCTTCAAGGGCTACTTACCTGCTCAA                          |
| <i>Act:D53-GFP</i>        | ActD53GFPF   | GGGCCCATGCCCACTCCGGTGGC                                 |
|                           | ActD53GFPR   | GCTAGCACAATCTAGAATTATTCTTGGCGGG                         |
| <i>Act:D14-GFP</i>        | ActD14GFPF   | AAGGGCCCATGCTGCGATCGACGCATCC                            |
|                           | ActD14GFPR   | AATCTAGAGTACCGGGCGAGAGCGC                               |
| <i>Act:D3-GFP</i>         | ActD3GFPF    | AAGGGCCCATGGCGGAAGAGGAGGAGGTG                           |
|                           | ActD3GFPR    | AATCTAGAATCATCAATTTGCCGGCTGTCA                          |
| <b>GST-D3</b>             | GST-D3F      | GAATTCATGGCGGAAGAGGAGGAG                                |
|                           | GST-D3R      | GTCGACATCATCAATTTGCCGGCTGTCA                            |
| <b>StrepD14HIS</b>        | StrepD14HISF | GGGGACAAGTTTGTACAAAAAAGCAGGCTTAATGCTGCGATCGACGCAT       |
|                           | StrepD14HISR | GGGGACCACTTTGTACAAGAAAGCTGGGTAGTACCGGGCGAGAGCGCG        |
| <i>35S:D53-GFP</i>        | 35SD53GFPF   | GGATCCATGCCCACTCCGGTGGC                                 |
|                           | 35SD53GFPR   | AAGCTTACAATCTAGAATTATTCTTGGCGGG                         |
| <b>D53antigen</b>         | D53antigenF  | GGGGACAAGTTTGTACAAAAAAGCAGGCTTAGACTTCGCGGCCCGCTCCCCGTAT |
|                           | D53antigenR  | GGGGACCACTTTGTACAAGAAAGCTGGGTATCCTGAAGCTACTGAGTGTA      |
| <i>Act:D14(S147A)-GFP</i> | D14S147AF    | CACGCCGTCTCCGCCATGA                                     |
|                           | D14S147AR    | TCATGGCGGAGACGGCGTG                                     |
| <i>Act:D14(D268N)-GFP</i> | D14SD268NF   | CCAGACCACCCGCAACGT                                      |
|                           | D14SD268NR   | ACGTTGCGGGTGGTCTGG                                      |
| <i>Act:D14(H297Y)-GFP</i> | D14H297YF    | CCAGACCGAGGGTTACCT                                      |
|                           | D14H297YR    | AGGTAACCCTCGGTCTGG                                      |
| <b>D53-RNAi</b>           | D53RNAi1F    | AGGATCC AAGCATCGGAGACCTCAA                              |
|                           | D53RNAi1R    | AAGGTACC CTGGAGGTCCCAATCCTT                             |
|                           | D53RNAi2F    | AGAGCTCAAGCATCGGAGACCTCAA                               |
|                           | D53RNAi2R    | AAACTAGT CTGGAGGTCCCAATCCTT                             |
| <b>MBP-D53</b>            | MBPD53F      | GGATCCATGCCCACTCCGGTGGC                                 |
|                           | MBPD53R      | AAGCTTACAATCTAGAATTATTCTTGGCGGG                         |
| <b>HisSUMOD14</b>         | D14SUMOF     | GGATCCTCGGGCGCAAGTCTGCTGCAAATC                          |
|                           | D14SUMOR     | GCGGCCGCTTAGTAACGGGCCAGAGCACGAC                         |
| <b>His-Trx-D53</b>        | His-Trx-D53F | GGATCCATGCCTACACCGGTTGCAGC                              |
|                           | His-Trx-D53R | GCGGCCGCTTAACAGTCCAGGATGATAC                            |
